# Supplementary material for: Epidemiology of serotype 19A isolates from invasive pneumococcal disease in German children
Source: Springer Nature journal article supplement (doi:10.1186/1471-2334-13-70), 2013-02-05

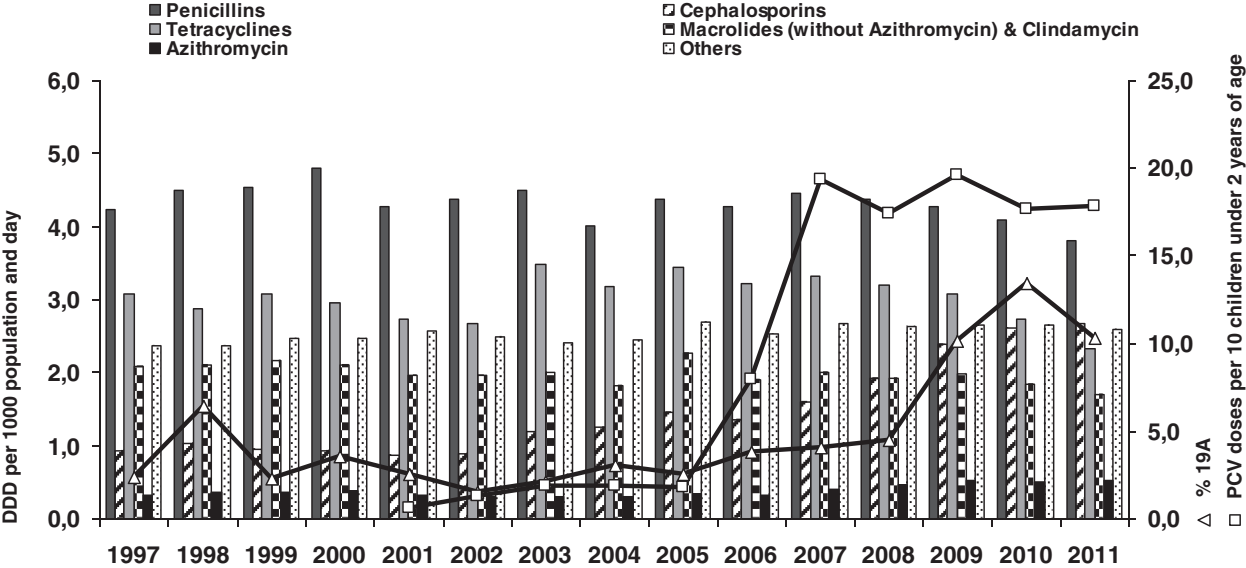

Supplement: 12879_2012_2244_MOESM2_ESM.pdf [file 12879_2012_2244_MOESM2_ESM.pdf]
